## **Molecular pathology of acute respiratory distress syndrome, mechanical ventilation and abnormal coagulation in severe COVID-19**

Antoine Soulé<sup>1,\*</sup>, William Ma<sup>1,\*</sup>, Katelyn Yixiu Liu<sup>2</sup>, Catherine Allard<sup>3</sup>, Salman Qureshi<sup>2</sup>, Karine Tremblay<sup>4,†</sup>, Amin Emad<sup>1,5,†</sup> and Simon Rousseau<sup>2,†</sup>

\* These authors contributed equally.

<sup>1</sup> Department of Electrical and Computer Engineering, McGill University, Montréal, QC, Canada

<sup>2</sup> The Meakins-Christie Laboratories at the Research Institute of the McGill University Health Centre Research Institute, & Department of Medicine, Faculty of Medicine, McGill University, Montréal, QC, Canada

<sup>3</sup> Statistical department, Centre de recherche du Centre hospitalier universitaire de Sherbrooke (CRCHUS), Sherbrooke, Canada.

<sup>4</sup> Pharmacology-physiology Department, Faculty of Medicine and Health Sciences, Université de Sherbrooke, Saguenay, QC, Canada; Centre intégré universitaire de santé et de services sociaux du Saguenay-Lac-Saint-Jean, Saguenay, QC, Canada; CRCHUS, Sherbrooke, Canada.

<sup>5</sup> Mila, Quebec AI Institute, Montréal, QC, Canada

† Co-corresponding Authors:

Simon Rousseau,  
RI-MUHC, E M3.2244, 1001 Décarie, Montréal H4A 3J1, Canada,  
Email: [simon.rousseau@mcgill.ca](mailto:simon.rousseau@mcgill.ca)

Amin Emad,  
755 McConnell Engineering Building, 3480 University Street, Montreal H3A 0E9, Canada  
Email: [amin.emad@mcgill.ca](mailto:amin.emad@mcgill.ca)

Karine Tremblay,  
Pavillon des Augustines, local AUG-5-01A, 225 St-Vallier street, Chicoutimi G7H 7P2, Canada  
Email: [karine.tremblay@usherbrooke.ca](mailto:karine.tremblay@usherbrooke.ca)

1 **Abstract**

2 Systemic inflammation in critically ill patients can lead to serious consequences such as acute  
3 respiratory distress syndrome (ARDS), a condition characterized by the presence of lung  
4 inflammation, edema, and impaired gas exchange, associated with poor survival. Understanding  
5 molecular pathobiology is essential to improve critical care of these patients. To this end, we use  
6 multimodal profiles of SARS-CoV-2 infected hospitalized participants to the Biobanque  
7 Québécoise de la COVID-19 (BQC-19) to characterize endophenotypes associated with different  
8 degrees of disease severity. Proteomic, metabolomic, and genomic characterization supported a  
9 role for neutrophil-associated procoagulant activity in severe COVID-19 ARDS that is inversely  
10 correlated with sphingosine-1 phosphate plasma levels. Fibroblast Growth Factor Receptor  
11 (FGFR) and SH2-containing transforming protein 4 (SHC4) signaling were identified as molecular  
12 features associated with endophenotype 6 (EP6). Mechanical ventilation in EP6 was associated  
13 with alterations in lipoprotein metabolism. These findings help define the molecular mechanisms  
14 related to specific severe outcomes, that can be used to identify early unfavorable clinical  
15 trajectories and treatable traits to improve the survival of critically ill patients.

16

## 17 **Introduction**

18 Acute respiratory distress syndrome (ARDS), a condition characterized by the presence of lung  
19 inflammation, edema, and impaired gas exchange, is observed in severe coronavirus disease  
20 2019 (COVID-19) and associated with poor survival. Mechanical ventilation is an important critical  
21 care management strategy for severe COVID-19 (1). However, during the first waves of the  
22 pandemic, almost half of patients undergoing invasive mechanical ventilation died based on case  
23 fatality rate reports (2). Defining the molecular mechanisms related to specific severe outcomes,  
24 such as ARDS or acute respiratory failure that require invasive mechanical ventilation, is  
25 important to identify treatable traits and improve the survival of critically ill patients.

26

27 Endophenotypes are subgroups which are inapparent to traditional methods but share a  
28 common set of factors that dictate their response in a manner that is distinct from other sub-  
29 groups (3). Endophenotypes have been described in airway diseases such as asthma (4), COPD,  
30 (5) and chronic rhinosinusitis (6). Recent studies have identified endophenotypes associated with  
31 COVID-19 severity using different large data sets, such as bulk transcriptomic from blood (7), bulk  
32 transcriptomic from neutrophil-enriched fractions (8), or proteomic in our accompanying  
33 manuscript (9).

34

35 In this manuscript, we report multimodal characterization of one of the six endophenotypes (EPs)  
36 identified in our accompanying manuscript (9), which we found to be associated with the worst  
37 clinical trajectory during hospitalization following SARS-CoV-2 infection (including ARDS). This

38 analysis reveals known and novel molecular effectors of immuno-thrombosis, ARDS and  
39 mechanical ventilation associated with COVID-19.

40

## 41 **Results**

### 42 **Serprocidins are enriched in an endophenotype associated with COVID-19 severity and ARDS**

43 To gain insight into the molecular mechanisms underlying the severity in COVID-19, we  
44 investigated the aptamers enriched within an endophenotype (EP6) (Figure 1 and Table S1) that  
45 we previously discovered using the circulating proteome of SARS-CoV-2 infected and hospitalized  
46 participants to BQC19 (n = 731) and found to be associated with severe outcome and ARDS (9).  
47 These aptamers correspond to measurements obtained using a multiplex SOMAmer affinity  
48 array. We used two-sided Mann–Whitney U (MWU) tests and the p-values were corrected for  
49 the number of aptamers and EPs using Benjamini–Hochberg (BH) false discovery rate (FDR).  
50 Consistent with the elevated neutrophil numbers in EP6, the most enriched aptamer was  
51 Cathepsin G (FDR = 4.10E-58), a serine protease localized in neutrophil azurophil granules.  
52 Notably, two other serprocidins, neutrophil elastase and proteinase-3, were also significantly  
53 enriched in EP6 (FDR = 1.04E-10 and FDR = 8.27E-7, respectively, Figure 1 and Table S1).  
54 Moreover, another NETosis-associated protein, Olfactomedin 4 (OLFM4) (10), was greatly  
55 enriched in EP6 (top 5%; FDR = 2.61E-46, Figure 1 and Table S1). This suggests an important role  
56 for neutrophil degranulation and/or NETosis in severe COVID-19.

57

58 **Pathway enrichment analysis identified FGFR-signaling in severe COVID-19 acute respiratory**  
59 **distress syndrome**

60 To capture a more comprehensive landscape of the signaling networks active in EP6, we  
61 performed pathway enrichment analysis using the Knowledge Engine for Genomics (KnowEnG)  
62 (11). Since aptamers were used to identify the EPs, it is expected that many of them would have  
63 significant associations with the EPs. As a result, we selected a very strict threshold of FDR < 1E-  
64 20 (two-sided MWU test, BH FDR) to identify top aptamers associated with EP6 (9). We then used  
65 the gene set characterization pipeline of KnowEnG with Reactome pathway collection (12). This  
66 analysis showed that EP6 is characterized by pathways associated with interleukins and cytokine  
67 signaling in the immune system. In addition, fibroblast growth factor receptor (FGFR) signaling  
68 was identified in EP6, suggesting this pathway as a potential driver of severe pathology (Table 1  
69 and S1).

70

#### 71 **EP6 metabolomic signature was associated with pro-coagulant activities and liver dysfunction**

72 To further characterize the pathobiology of severe COVID-19 disease, metabolomic profiling of  
73 plasma samples was performed in parallel to the aptamer analysis. The results yielded data on  
74 1,435 metabolites, of which 576 were found significantly altered in EP6 (two-sided MWU FDR <  
75 0.01) (Table S2). Characterization of the plasma samples supported the distinction among the  
76 different EPs at the levels of metabolomic sub-pathways and individual metabolites (Figure 2 and  
77 Table S2). The two top sub-pathways (FDR < 0.01) “Methionine, Cysteine, SAM and Taurine  
78 Metabolism” and “phosphatidylethanolamine (PE)”, are known to interact (13, 14) and are  
79 associated with pro-coagulant activities. Phospholipids-containing microparticles from platelet  
80 activation contribute to Tissue Factor activation and pro-thrombinase activity (15), linking PE to  
81 coagulation and D-dimers level, which are elevated in EP6 (9). PE methylation acts as a major

82 consumer of S-Adenosylmethionine (SAM) leading to the synthesis of S-Adenosylhomocysteine  
83 (SAH) and cystathionine (14), upstream of 2-hydroxybutyrate and 2-aminobutyrate in a model of  
84 hepatotoxicity (16). SAH, cystathionine, 2-hydroxybutyrate and 2-aminobutyrate are all  
85 significantly enriched in EP6 (Figure 2B and 3A). To identify relationships that may shed light on  
86 factors influencing clinical laboratory results that define EP6, we also performed Spearman's rank  
87 correlation analyses between 21 blood variables and metabolites (Table S3). SAH is positively  
88 correlated with creatinine, while cystathionine is positively correlated with creatinine and  
89 negatively correlated with albumin (Figures 4, S1-S2), congruent with the data from the model of  
90 hepatotoxicity (16), linking abnormal coagulation and liver damage in severe COVID-19. We also  
91 observed kynurenine to be enriched in EP6 but depleted in EP1 (Figures 3 and 5). Kynurenine  
92 levels were also found to be positively correlated with D-Dimers levels (Figure 4 and S1-S2),  
93 suggesting a role of this metabolite of the tryptophan pathway in abnormal coagulation in severe  
94 COVID-19. Interestingly, TNFSF18 (GITR), a T-cell receptor that can activate indoleamine 2,3-  
95 dioxygenase (IDO) to increase kynurenine synthesis (17) in allergy, is enriched in EP6 and  
96 depleted in EP1 (Figures 3 and 5).

97

#### 98 **Low levels of sphingosine-1 phosphate are associated with COVID-19 ARDS**

99 Strikingly, sphingosine-1 phosphate was enriched in EP1 and depleted in EP6 (Figures 3 and 5),  
100 confirming the previously reported negative association of this metabolite with COVID-19 ARDS  
101 (18). Accordingly, the aptamer detecting neutral ceramidase, an enzyme converting ceramides  
102 into sphingosine, is enriched in EP1 (FDR = 2.65E-10, Table S1). While changes in protein  
103 abundance as detected by aptamers may not necessarily reflect changes in enzymatic activity, it

104 is interesting to note that dihydroceramides and ceramides are depleted in EP1 (Figure 5, Table  
105 S1). Conversely, dihydroceramides and ceramides are significantly enriched in EP6 (Figure 3,  
106 Table S1). Moreover, one of the top aptamers found enriched in EP6 (FDR = 2.10E-56, Figure 1)  
107 is serine palmitoyltransferase 2 (SPTLC2), an enzyme that is responsible for the rate-limiting step  
108 in *de novo* sphingolipid biosynthesis (19, 20).

109

### 110 **Mechanical ventilation in EP6 is associated with lipoprotein metabolism**

111 As noted in the introduction, mechanical ventilation in COVID-19 is associated with a high  
112 mortality rate. Within EP6, 55 out of the 118 individuals received mechanical ventilation. Within  
113 all EP6 members that share the overall similar aptamer signature, we identified a subset of  
114 aptamers and metabolites that were significantly different between those with or without  
115 mechanical ventilation (Figure 6A and Table S4). The second most enriched aptamer (Table 2 and  
116 S4), angiotensin-like 3 (ANGPTL3), corresponds to a liver-secreted regulator of lipoprotein  
117 metabolism (21), which may reflect alterations observed in fatty acid metabolites (Table S4).  
118 There were no significant differences between the two groups in terms of sex, age, or body mass  
119 index (BMI) (Figure 6B-6C and Table S4). Finally, we investigated whether molecular information  
120 (proteomic and/or metabolomic) was associated with mechanical ventilation duration. We  
121 identified alpha-L-iduronidase (IDUA) to be inversely correlated with duration of ventilation in  
122 the patients with mechanical ventilation in EP6 (Spearman's rank correlation = -0.60, FDR = 2.57E-  
123 2, Figure 6D and Table S4). Overall, these results point to an association between altered  
124 lipoprotein metabolism and mechanical ventilation in EP6.

125

126 **SHC4 genotype and protein expression levels are associated with higher odds of belonging to**

127 **EP6**

128 To obtain independent support for the involvement of specific proteins identified using  
129 aptamers, we leveraged genome-wide association study (GWAS) genotyping data corresponding  
130 to these patients. We identified 25 single nucleotide variations (SNVs) distributed in 13 annotated  
131 genes that were below a p-value threshold of 1E-4 and distinguished EP6 from the rest (Table 3).  
132 We then investigated each of the SNVs to which we could assign a gene and an aptamer, to assess  
133 whether their protein product in circulation was differentially regulated by the genotype (Table  
134 4). We discovered two genes, *SHC4* (encoding SHC adaptor protein 4) and *CACNA2D3* (encoding  
135 calcium voltage-gated channel auxiliary subunit alpha2 delta3) for which there was a significant  
136 association between genotype and protein expression levels (p-values < 0.05). While *CACNA2D3*  
137 may have mild impact on EP6 membership (odds ratio = 0.61, Table 4), *SHC4* was one of the top-  
138 enriched aptamers (position 32 out of 4,985, Figure 1) for inclusion in EP6, with an odds ratio of  
139 11.98 for the protein product and 2.00 for the alternate allele, respectively. Finally, to gain further  
140 insight into the potential role of *SHC4* in COVID-19 disease severity, we investigated the  
141 metabolites associated with *SHC4* in EP6. The only significantly correlated metabolite was 6-  
142 oxopiperidine-2-carboxylate (Spearman's rank correlation = 0.40, FDR = 0.012, Figures 4, S1-S2),  
143 where the p-values were corrected for the number of metabolites using BH FDR. Therefore, the  
144 GWAS analysis revealed that the signaling adaptor protein *SHC4* may play an important  
145 mechanistic role in contributing to severe disease pathology.

146

147 **Discussion**



148 In this study, we leveraged the molecular features associated with endophenotypes discovered  
149 using unsupervised hierarchical clustering of circulating proteome of SARS-CoV-2 positive  
150 hospitalized participants to BQC19 to improve our understanding of pathobiology. This approach  
151 enabled the identification of the following molecular features: 1) the level of Sphingosine-1  
152 phosphate is highest in EP1 and lowest in EP6, reflecting an inverse association with time to  
153 admission to ICU and/or death; 2) interleukins and FGFR signaling are molecular pathways  
154 associated with severe COVID-19; 3) genetic and environmental determinants of SHC4 expression  
155 are associated with inclusion in EP6; 4) the combined proteomic and metabolomic signature of  
156 EP6 supports a pathologic role for neutrophil-associated procoagulant activity in COVID-19 ARDS;  
157 and 5) mechanical ventilation in EP6 is associated with altered lipoprotein metabolism.

158

159 *COVID-19 ARDS molecular pathology: a counterbalance between ceramides and sphingosine is*  
160 *associated with critical illness.*

161 The datasets used in this study carry rich molecular information on mechanisms of disease for  
162 COVID-19. EP6 is characterized by its enrichment in ARDS (50% vs 9% in EP1), acute kidney injury  
163 (50%) and liver dysfunction (22%) (9). Low levels of Sphingosine 1-phosphate (S1P) are associated  
164 with ARDS and have been shown to be associated with greater ICU admission and decreased  
165 survival in COVID-19 (18), and is supported by this study where S1P levels were found depleted  
166 in EP6 but enriched in EP1 (the endophenotype with the best prognostic). The study also supports  
167 a shunting away from sphingosine towards more pro-inflammatory ceramides that are associated  
168 with metabolic disorders (22), suggesting a counterbalance between ceramides and sphingosine,

169 where the former is associated with poorer outcomes during critical illness, whereas higher levels  
170 of the latter is associated with more favorable outcomes in ARDS.

171

172 *Molecular mechanisms of mechanical ventilation in EP6: a potential role for ANGPTL3*

173 ANGPTL3 is a liver-secreted enzyme that can inhibit lipoprotein and endothelial lipase (23). Loss-  
174 of-function of ANGPTL3 is associated with hypolipidemia (24). Therefore, increased circulating  
175 levels of ANGPTL3 would be expected to raise plasma levels of triglycerides and phospholipids  
176 which is consistent with the observed metabolomic profiles (Table S4). Whether these alterations  
177 are sufficient to increase the likelihood of mechanical ventilation remains speculative.  
178 Nevertheless, it is interesting to note that administration of medium- and long-chain triglycerides  
179 can aggravate gas exchange abnormalities in ARDS (25) and may warrant the preclinical  
180 investigation of ANGPTL3 antagonists like evinacumab or other functionally similar therapeutic  
181 agents (26) in ameliorating outcomes in ARDS. As for the duration of mechanical ventilation, we  
182 discovered an inverse correlation with IDUA, a lysosomal enzyme required for the degradation  
183 of heparan sulfate and dermatan sulfate (27). Our current data cannot distinguish between the  
184 presence of this enzyme as a biomarker or as an active mediator that influences the course of  
185 COVID-19-associated acute respiratory failure.

186

187 *Multimodal profiling of EP6 supports a role for neutrophil-derived procoagulant activity-mediated*  
188 *organ damage in COVID-19.*

189 COVID-19 ARDS has been found to be more frequently associated with thrombotic complications  
190 than non-COVID-19 ARDS (28, 29). In addition, histopathologic evidence of pulmonary

191 microthrombi is frequently observed in autopsies of individuals deceased with COVID-19 (30).  
192 Early reports suggested a role for neutrophil-mediated release of NETs contributing to  
193 endothelial dysfunction as a mechanism of microthrombosis in COVID-19 ARDS (31-42). The  
194 neutrophil-derived serprocidins cathepsin G, neutrophil elastase, and proteinase-3, are  
195 significantly enriched in EP6. In addition to their roles in bacterial killing, serprocidins couple  
196 innate immunity to coagulation, where they promote coagulation by enhancing tissue factor and  
197 factor XII-dependent coagulation (43). Serprocidins are also important regulators of NETosis (44).  
198 In pediatric sepsis, another NETosis-associated protein olfactomedin 4 (OLFM4) (10), enriched in  
199 EP6, is associated with increased odds of having greater organ failure and death (45). The  
200 procoagulant environment associated with COVID-19-associated organ damage is further  
201 supported by the alteration in metabolic profiles in EP6. Phosphatidylethanolamines (PE)  
202 become exposed at the surface of cell membranes upon exposure to stress, inflammation, and  
203 cell death (46, 47). In a Syrian hamster model, infection with SARS-CoV-2 markedly increased  
204 circulating PE expression in the animals that were fed a high salt, high fat diet, demonstrating the  
205 interaction between infection and metabolic disorder (48). Furthermore, the membranes of  
206 azurophilic granules, which contain serprocidins, are enriched in PE (49). Accordingly, EP6 is  
207 associated with decreased platelet counts, increased D-Dimers, international normalized ratio  
208 (INR) and activated partial thromboplastin time (aPTT) (9), hallmarks of abnormally activated  
209 coagulation pathways that are associated with serious and often lethal complication of sepsis  
210 (50). Accordingly, we report an association between kynurenine and D-dimer, pointing to an  
211 involvement of tryptophan metabolism in abnormal coagulation. Interestingly, TNFSF18, a T-cell  
212 receptor that promotes leukocyte adhesion to endothelial cells (51), is enriched in EP6. A SNV

213 found in the proximity of TNFSF18 was found associated with severity of COVID19 in the western  
214 Indian population (52). Unfortunately, this SNV was absent from the array used in BQC19  
215 preventing the confirmation of that observation, but it is nevertheless suggestive of a link  
216 between TNFSF18, kynurenine, and abnormal coagulation in severe COVID-19. Collectively, these  
217 findings point to immuno-thrombosis activity in EP6 in response to SARS-CoV-2 infection that is  
218 associated with abnormal coagulation. Recent results from the Antithrombotic Therapy to  
219 Ameliorate Complications of COVID-19 (ATTACC) study showed anticoagulation to be efficacious  
220 in moderate but not severe COVID-19 disease (53, 54), revealing a need for alternative  
221 management approaches in critically ill patients.

222

#### 223 *Novel molecular markers of COVID-19 pathology: FGFR and SHC4*

224 Two novel molecular factors associated with COVID-19 ARDS that were identified by our study  
225 are FGFR and SHC4. Circulating levels of the pro-angiogenic FGF-2 has been associated with  
226 COVID-19 severity and creatinine levels in a study of 208 SARS-CoV-2 positive participants (55).  
227 It is also noteworthy that the use of nintedanib, an inhibitor of FGFR, vascular endothelial growth  
228 factor receptor (VEGFR), and platelet-derived growth factor receptor (PDGF-R) that is approved  
229 for use in interstitial lung disease, improved pulmonary inflammation and helped three middle-  
230 aged obese COVID-19 patients with markedly impaired lung function wean off mechanical  
231 ventilation (56). While the adaptor protein SHC4 has not been experimentally demonstrated to  
232 modulate FGFR signaling, a 12-gene biomarker signature associated with melanoma contains  
233 FGFR2, FGFR3 and SHC4 (57). It is attractive to speculate that SHC4 may act downstream of FGFR  
234 or other associated growth factor receptors, favoring heightened procoagulant activity

235 associated with COVID-19 ARDS. In view of the limited knowledge of this understudied member  
236 of the SHC family, we looked at the metabolites associated with SHC4 to gain insights into its  
237 possible functions. Interestingly, 6-oxopiperidine-2-carboxylate (the only metabolite with a  
238 significant correlation with SHC4 in EP6) was found to be negatively associated with glomerular  
239 filtration rate in a GWAS study of kidney disease and hypertension in African Americans (58).  
240 Acute kidney injury is a frequent complication of acute liver failure (59), and liver dysfunction is  
241 associated with abnormal coagulation (60). Thus, the overall molecular information coming from  
242 the multi-modal analysis of EP6 points to a triad between liver function, kidney function, and  
243 hemostasis that becomes dysfunctional following ARDS-associated inflammation driven by SARS-  
244 CoV-2 infection. Whether the presence of SHC4 in circulation is a marker of dysfunction of this  
245 triad, or an active mediator, remains to be determined. Moreover, the identity of the cells  
246 expressing SHC4 leading to its presence in the circulation is not known. Taken together, our  
247 identification of FGFR and SHC4 signaling pathways distinguishing EP6 from other  
248 endophenotypes provides a rationale for investigation of their potential utility as biomarkers of  
249 severe disease activity and/or the use of antagonists of those pathways to treat severe COVID-  
250 19 disease manifestations.

251

## 252 **Methods:**

### 253 **Datasets and preprocessing**

254 We obtained data corresponding to clinical, genomics, metabolomics, and proteomics  
255 (circulating proteome) of n = 731 hospitalized and SARS-CoV-2 positive patients (based on qRT-  
256 PCR) from the Biobanque Québécoise de la COVID-19 (BQC19; [www.quebecovidbiobank.ca](http://www.quebecovidbiobank.ca)).

257 The circulating proteome measurements obtained using a multiplex SOMAmer affinity array  
258 (SomaLogic, 4,985 aptamers) between April 2020 and April 2021 were preprocessed and used to  
259 identify six endophenotypes (EP1-EP6). The details of the cohort, circulating proteome data  
260 processing, and identification of endophenotypes are provided in the accompanying manuscript  
261 (9).

262

263 In this study, we used the batch-normalized, missing-values-imputed, and log-transformed  
264 version of the BQC19 metabolomic data (1,435 metabolites). BQC19 GWAS imputation data were  
265 generated by Tomoko Nakanishi at Brent Richards lab, Jewish General Hospital and McGill  
266 University. Detailed codes used for generating the data can be found in:  
267 [https://github.com/richardslab/BQC19\\_genotype\\_pipeline](https://github.com/richardslab/BQC19_genotype_pipeline).

268

### 269 **Analyses of the GWAS dataset**

270 For the GWAS analyses, annotation of SNVs were done using the biomaRt package (61) from R  
271 (62), and all analyses were done using R version 4.1.3. Quality control steps were derived in  
272 majority from a 2017 QC tutorial article (63). At the beginning, we had 867,450 markers and 2,429  
273 samples. We imported Plink format data into R using the “read\_plink” function from genio R  
274 package (64). We removed 103,592 non ACGT bi-allelic markers. We calculated the predicted sex  
275 by looking at the rate of homozygote markers on chromosome 23. We removed 3,588 markers  
276 with call rates < 98%, 448,932 monomorphic markers and markers with MAF < 0.05, and 28,092  
277 markers with Hardy–Weinberg equilibrium < 1E-6 (calculated by the “HWE.exact” function from  
278 the genetics package (65) from R. For the EP6 cluster group analyses, we additionally removed

279 1,747 samples that were not in the cluster analysis, 8 samples with a sex discrepancy (based on  
280 predicted sex calculated earlier and reported sex), and 3 samples with a heterozygosity rate > 3  
281 standard deviations. We finally removed a pair of samples which had approximately the same  
282 genome, likely due to an error of manipulation. As we could not know which one was correct, we  
283 removed both. We also found 2 pairs of individuals with a pi-hat of ~0.5 (meaning first degree  
284 relatives), so we kept the one sample per pair with the higher call rate. All other pairs of  
285 individuals had a pi-hat < 0.21 that is judged acceptable considering our population. Pi-hats were  
286 calculated with the “snpGDSIBDMoM” function from SNPRelate R package (66). At the end of  
287 quality controls, 283,246 markers on 655 samples had been used to perform association analyses.

288

289 To perform the principal component analyses (PCA), we took a subsample of independent  
290 markers (pruning) with a maximum sliding window of 500,000 base pairs and a linkage  
291 disequilibrium (LD) threshold of 0.2 using the “snpGDSLdPruning” function from the SNPRelate R  
292 package. We ran the PCA with the “snpGDSPCA” function from SNPRelate package from R. The  
293 first 2 principal components (PCs) were considered significant.

294

295 For the GWAS analyses of the 283,246 remaining markers between EP6 cluster compared to all  
296 others, we used a logistic regression model, with the dichotomous variable indicating if the  
297 participants belong to the EP6 cluster as the outcome variable. We used the additive model for  
298 markers as an independent variable, and we adjusted the models with the first two PCs. Odds  
299 ratio and p-values were calculated on each model. Quantile–quantile (Q–Q) plots have been  
300 performed as quality control of the models; p-values were plotted using “qqplot.pvalues”

301 function from *gaston* R package (67) (data not shown). We compared the aptamers' normalized  
302 level of expression between the three groups of genotypes for each studied gene by performing  
303 standard analysis of variance (ANOVA) analyses followed by Tukey *post hoc* tests (referred to in  
304 this study as pQTL analysis). Since aptamers tested are limited compared to SNVs, we fixed  
305 significance p-value threshold below  $1E-4$  to report more SNVs instead of the more common  $1E-$   
306  $5$  suggestive threshold. Finally, to identify if EP6 may be characterized by the aptamers and the  
307 SNVs, we performed multiple logistic regression analysis including aptamers expression values,  
308 SNV genotypes (additive model), and the two principal components. Odds ratios are reported  
309 with 95% confidence intervals.

310

### 311 **Metabolomic pathway characterization of EP6**

312 The 1,435 metabolites measured were organized into 122 sub-pathways in the original dataset  
313 (denoted as "SUB\_PATHWAYS"). We first identified metabolites whose values were significantly  
314 higher or lower in EP6 compared to other EPs (two-sided MWU test,  $FDR < 0.01$ ). Then, we used  
315 these metabolites to perform pathway enrichment analysis (one-sided Fisher's exact test) based  
316 on 122 pathways. The resulting p-values were then corrected for multiple tests using Benjamini–  
317 Hochberg FDR.

318

### 319 **Statistics**

320 Several non-parametric tests, including the MWU test, Fisher's exact test, and Spearman's rank  
321 correlation, were used in this study. Benjamini–Hochberg FDR was used to adjust the p-values  
322 for multiple tests.



323

324 **Study approval**

325 The study was approved by the Institutional Ethics Review Board of the “Centre intégré  
326 universitaire de santé et de services sociaux du Saguenay-Lac-Saint-Jean” (CIUSSS-SLSJ) affiliated  
327 to the Université de Sherbrooke [protocol #2021-369, 2021-014 CMDO – COVID19].

328

329 **Acknowledgements**

330 This work was made possible through open sharing of data and samples from the Biobanque  
331 Québécoise de la COVID-19, funded by the Fonds de recherche du Québec - Santé, Génome  
332 Québec, the Public Health Agency of Canada and, as of March 2022, the Ministère de la Santé et  
333 des Services Sociaux du Québec. We thank all participants to BQC19 for their contribution. This  
334 study was supported by the Fonds de recherche du Québec - Santé (FRQS)- Cardiometabolic  
335 Health, Diabetes and Obesity Research Network (CMDO)- Initiative. This work was also supported  
336 by Natural Sciences and Engineering Research Council of Canada (NSERC) grant RGPIN-2019-  
337 04460 (AE).

338

339 **Conflict of Interests**

340 The authors have declared that no conflict of interest exists.

341

342

343

344 **Figures**

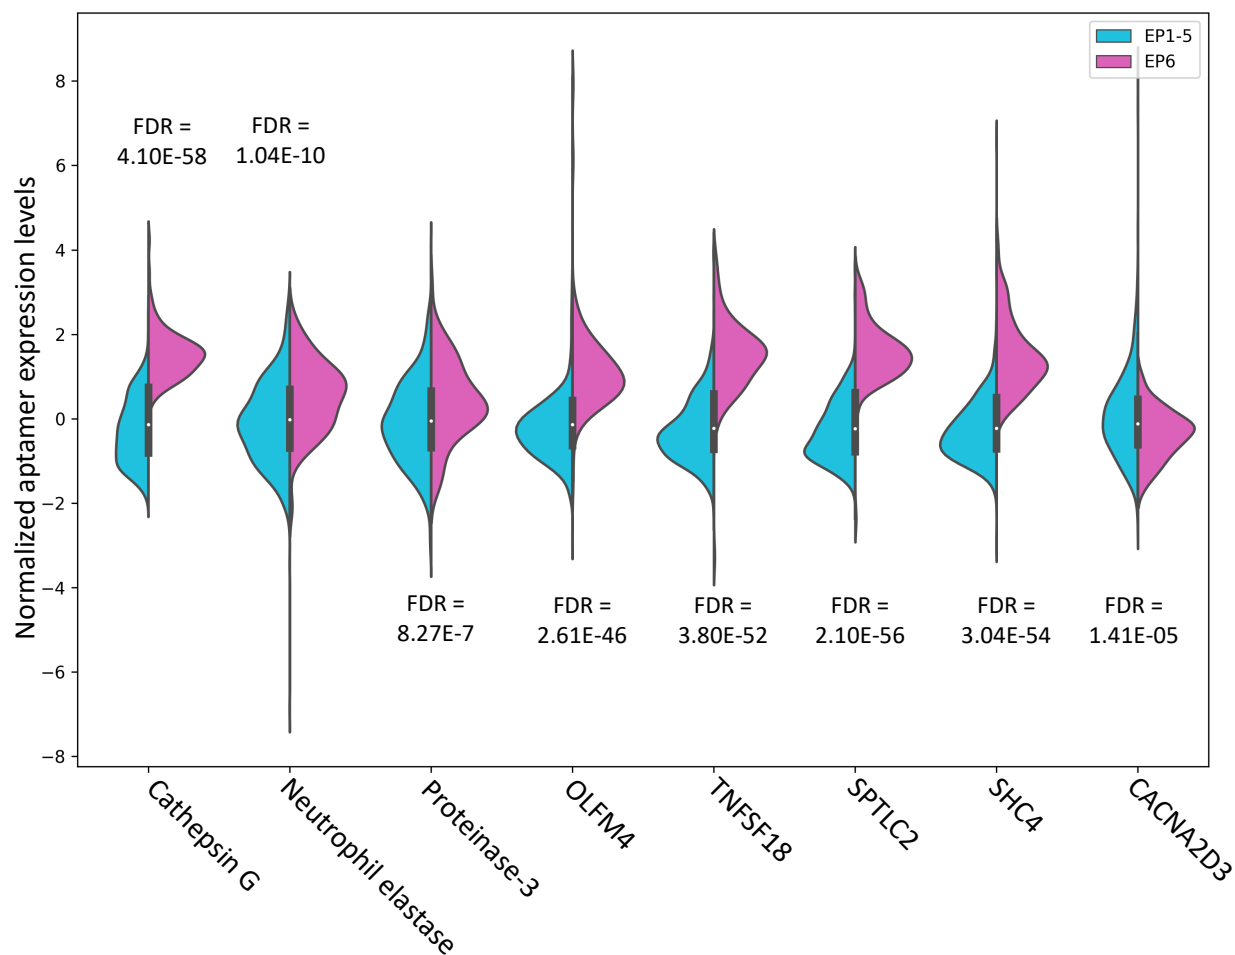

345  
346 **Figure 1:** Distribution of aptamer expressions in EP6 versus other EPs.  
347 The violin plots show the distribution of aptamer expressions for patients in EP6 (magenta) versus  
348 EP1-5 (teal). Two-sided Mann–Whitney U (MWU) tests followed by Benjamini–Hochberg method  
349 for adjusting the p-values were used to calculate false discovery rates.

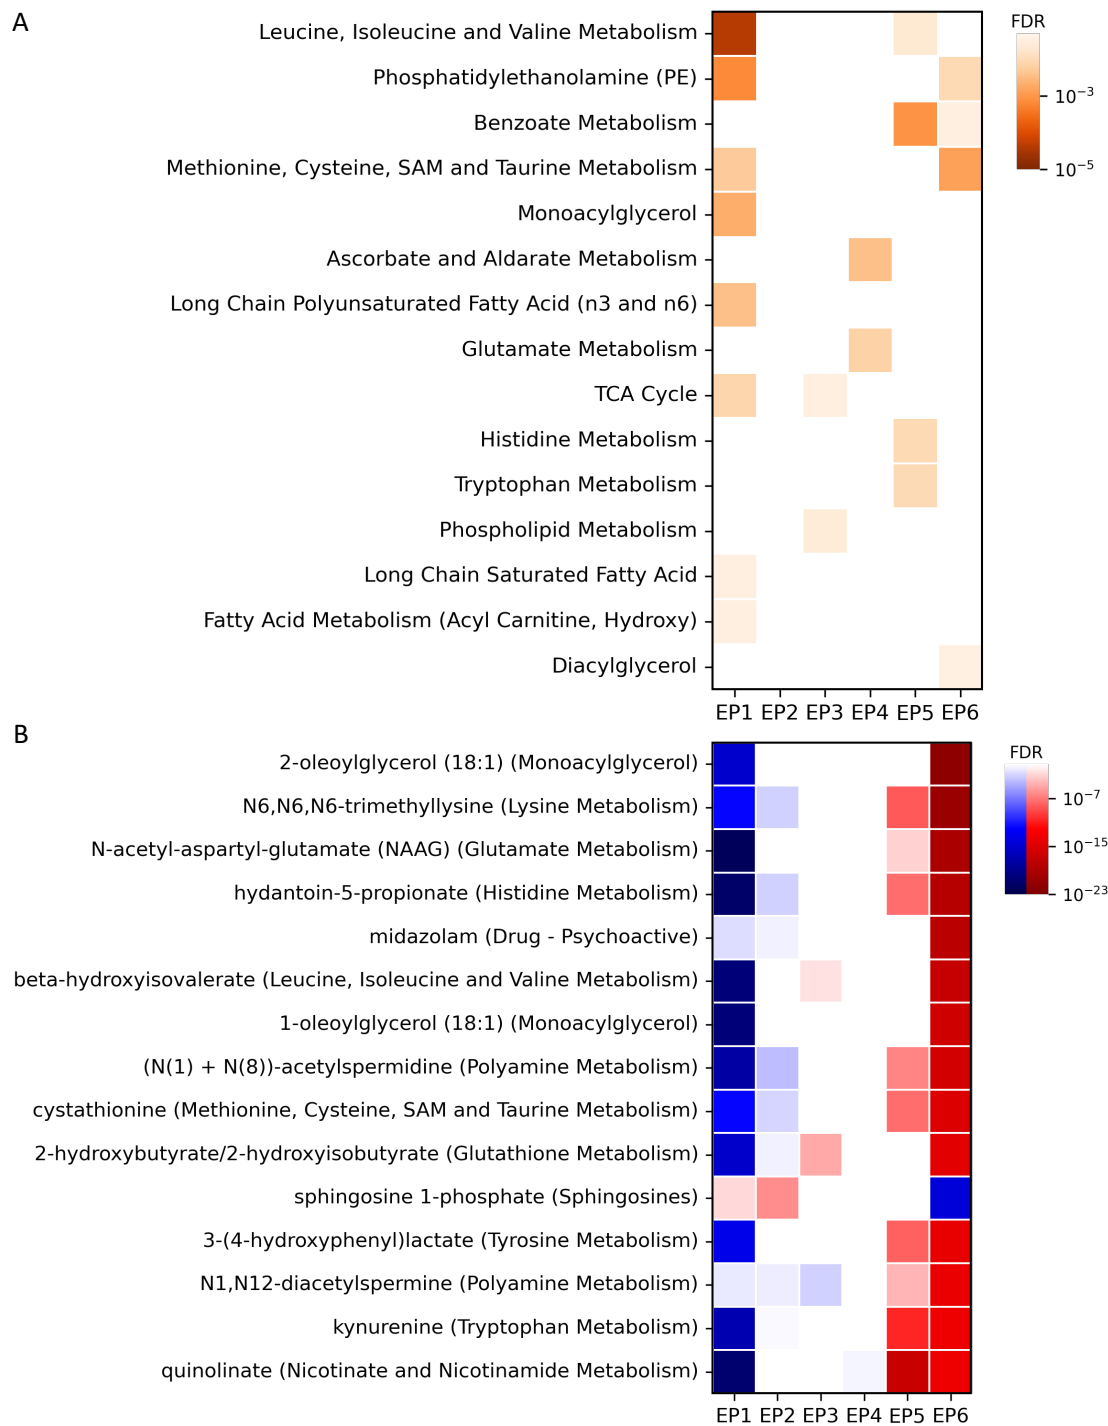

350  
351  
352  
353  
354  
355  
356  
357

**Figure 2:** Metabolite characteristics of endophenotypes (EPs).

A) The heatmap shows the enrichment (one-sided Fisher's exact test) of EPs in different metabolite sub-pathways. See Table S2 for the full list. B) The heatmap shows the over-expression (red) and under-expression (blue) of metabolites in different EPs (two-sided Mann-Whitney U test). Row names show metabolites followed by the sub-pathway to which they belong in parentheses. Only top 15 metabolites (based on false discovery rate for EP6) for which a definite name and sub-pathway was available are shown. Full list is provided in Table S2.

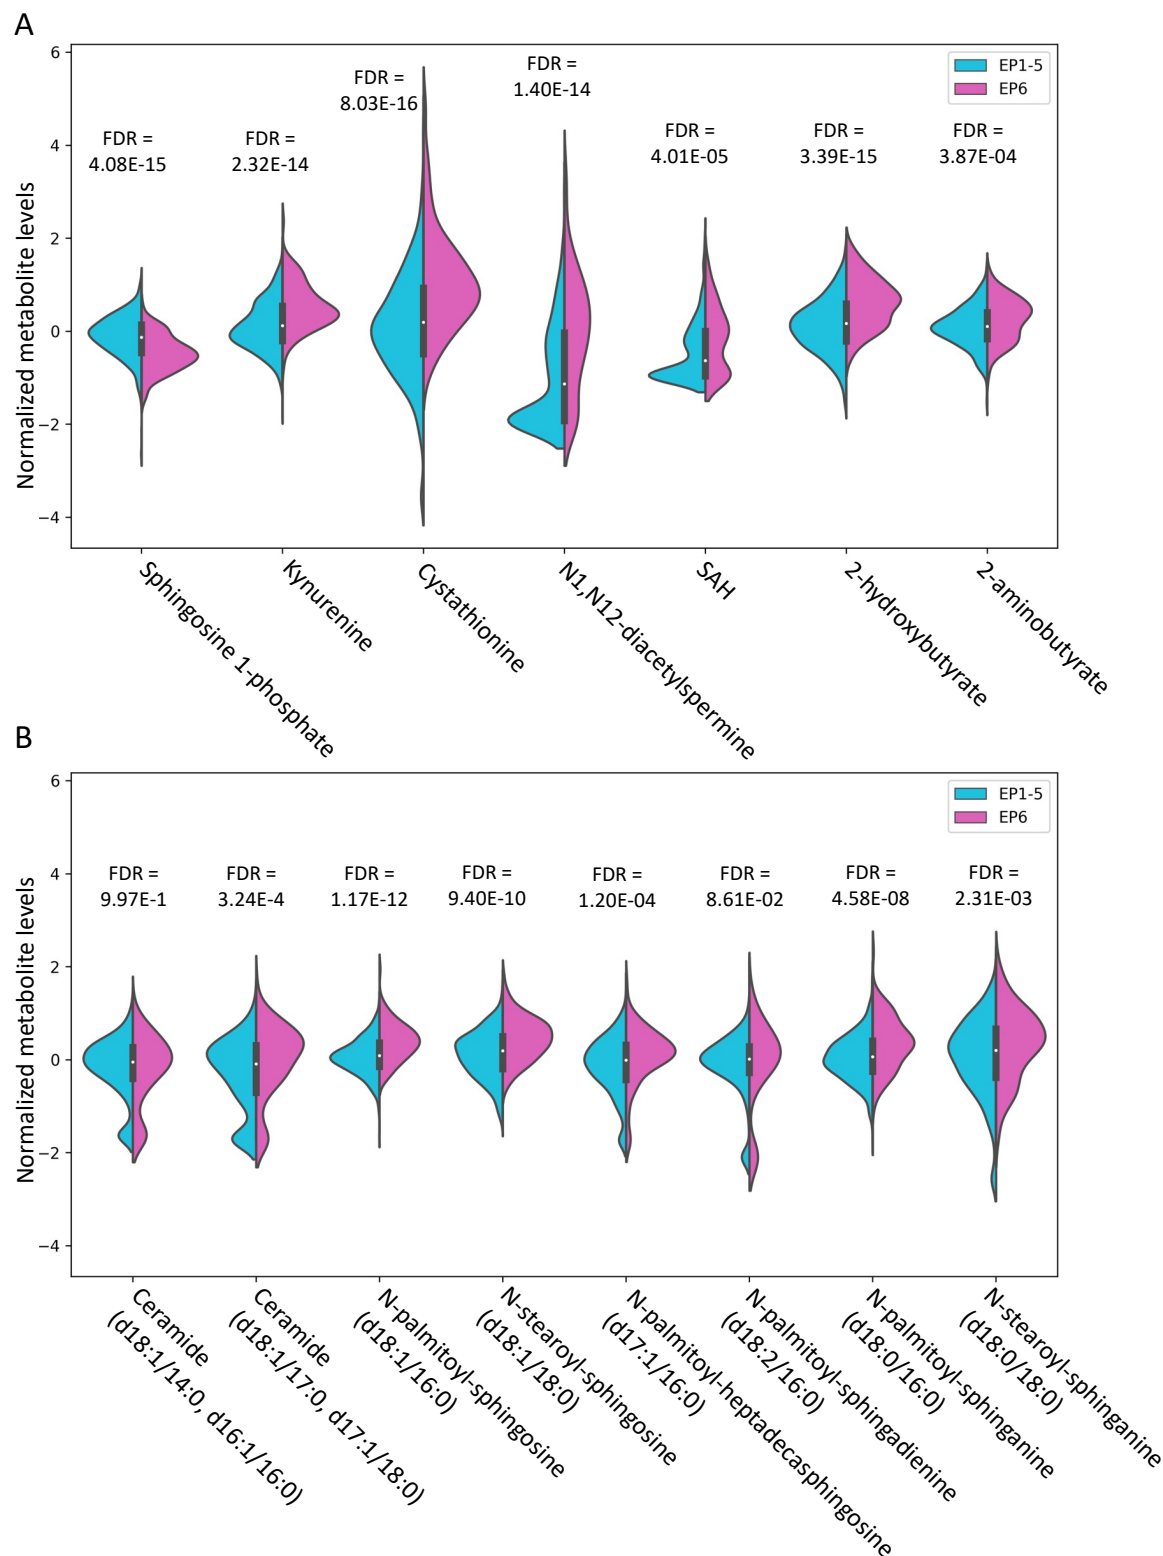

358

359 **Figure 3:** Distribution of metabolite levels in EP6 versus other EPs.

360 The violin plots show the distribution of metabolite levels for patients in EP6 (magenta) versus

361 EP1-5 (teal). Two-sided Mann–Whitney U (MWU) tests followed by Benjamini–Hochberg method

362 for adjusting the p-values were used to calculate false discovery rates.

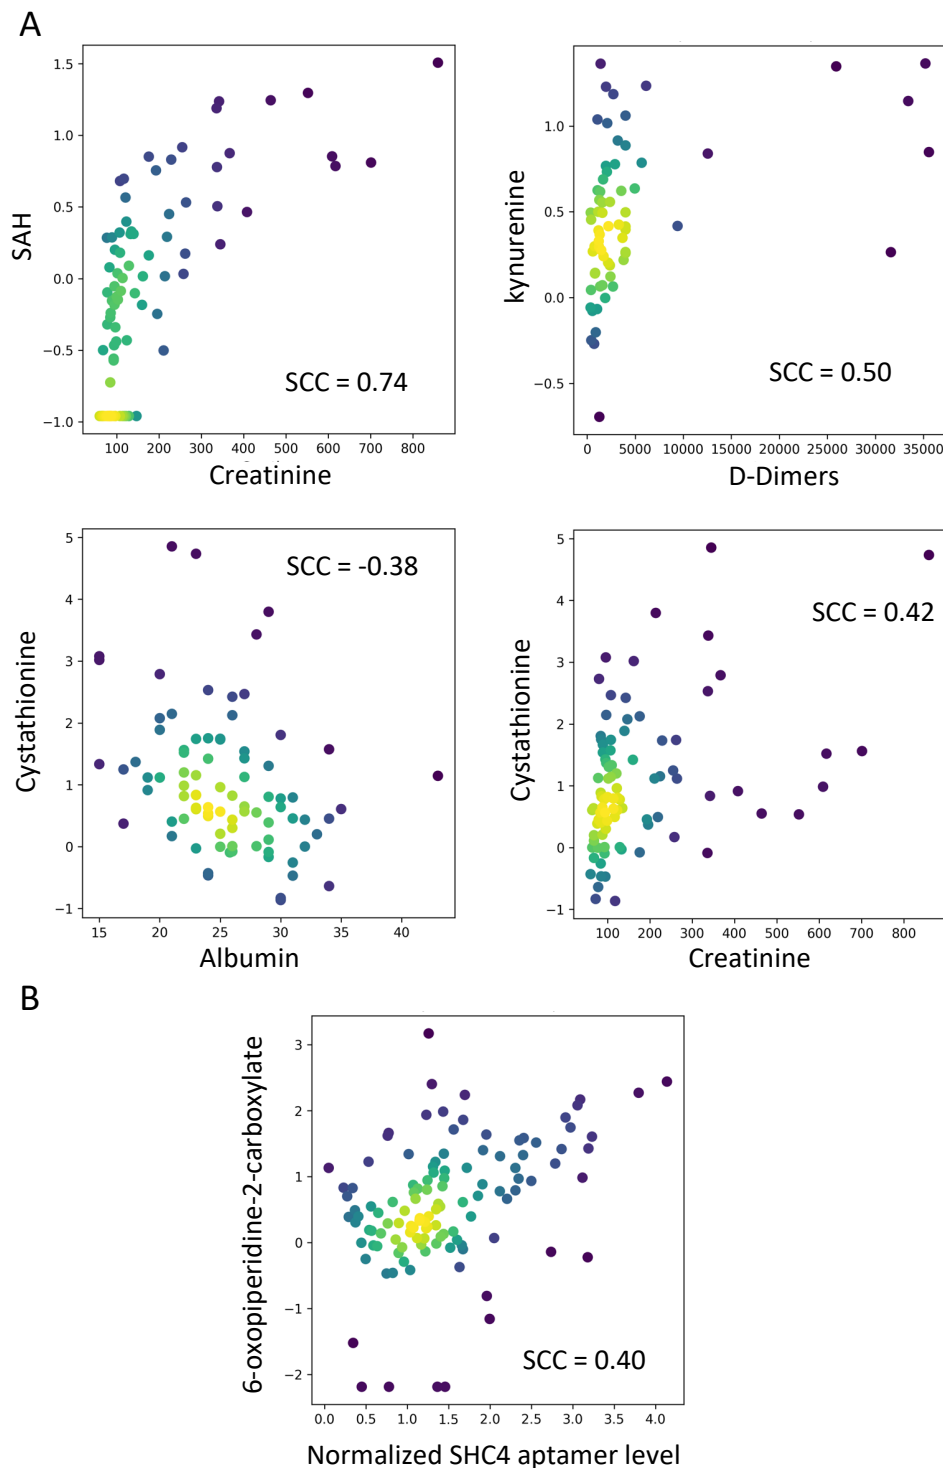

363  
364 **Figure 4:** Correlation between different variables in EP6.  
365 Each circle in the scatter plots correspond to a patient in EP6. The circles are colored based on  
366 the density of points surrounding them for clearer visualization. SCC corresponds to Spearman's  
367 rank correlation coefficient. A) Scatter plots reflecting the correlation between metabolites (y-  
368 axis) and blood variables (x-axis). B) Scatter plot corresponding to correlation of 6-oxopiperidine-  
369 2-carboxylate and SHC4.

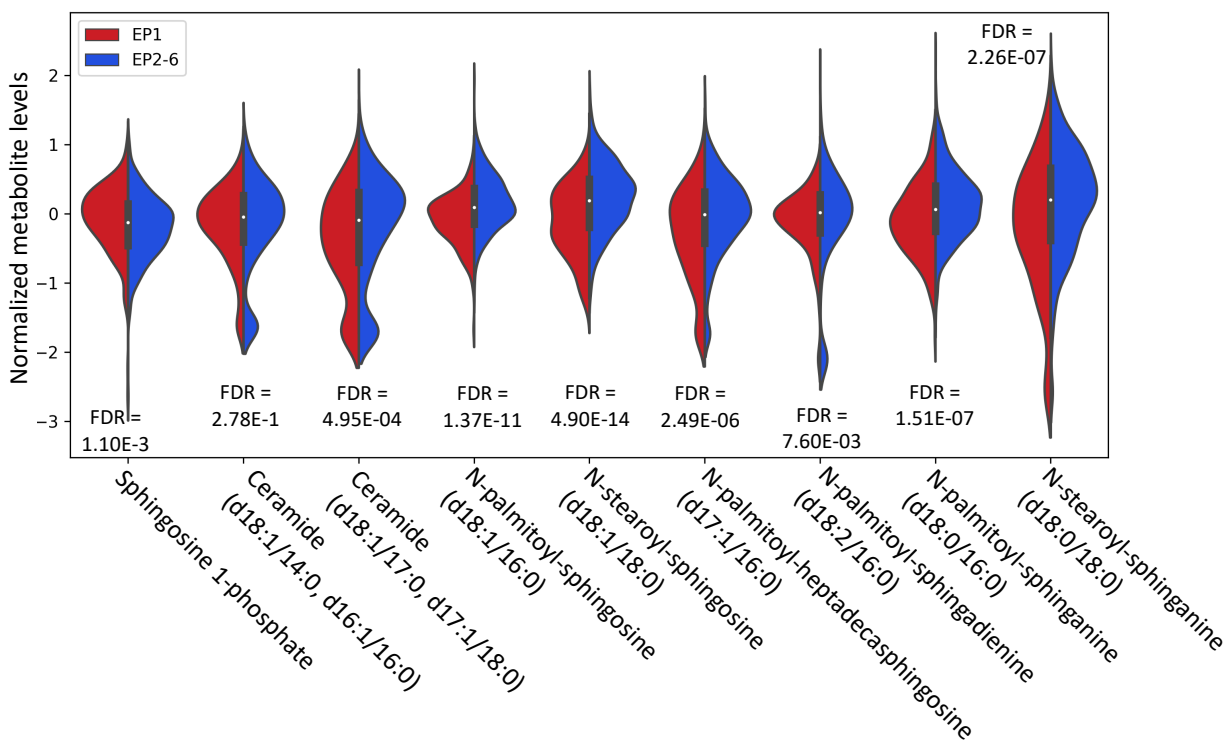

370  
371 **Figure 5:** Distribution of metabolite levels in EP1 versus other EPs.  
372 The violin plots show the distribution of metabolite levels for patients in EP1 (red) versus EP2-6  
373 (blue). Two-sided Mann–Whitney U (MWU) tests followed by Benjamini–Hochberg method for  
374 adjusting the p-values were used to calculate false discovery rates.  
375

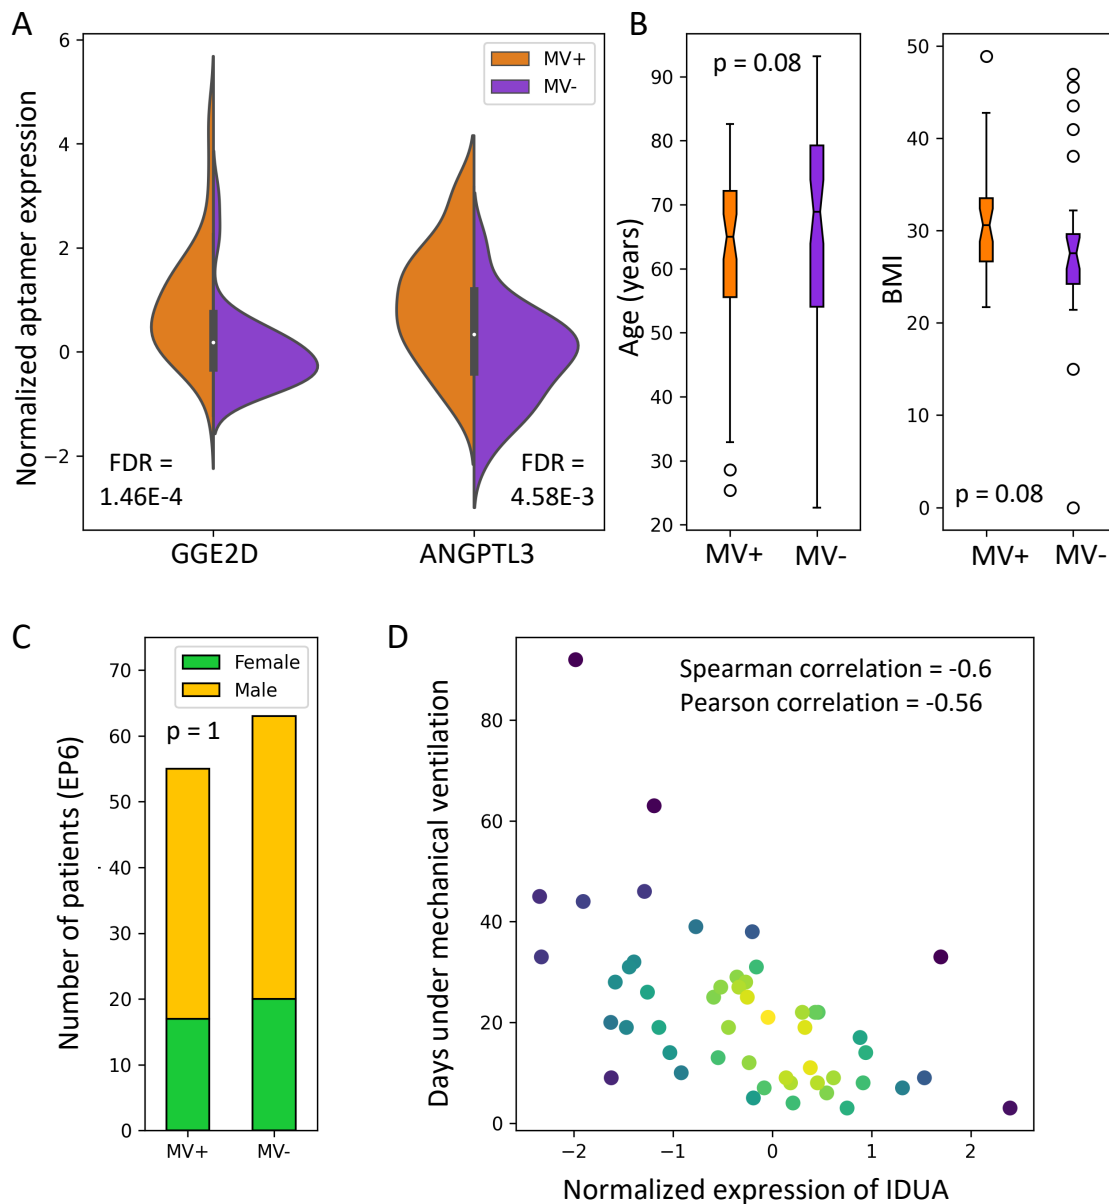

376  
377  
378  
379  
380  
381  
382  
383  
384  
385  
386  
387  
388

**Figure 6:** Mechanical ventilation in EP6.

A) The violin plots show the distribution of aptamer expressions for patients in EP6 that received mechanical ventilation (MV+) versus those that did not (MV-). Two-sided Mann–Whitney U (MWU) tests followed by Benjamini–Hochberg method for adjusting p-values were used to calculate false discovery rates. B) Distribution of age and BMI of MV+ and MV- patients in EP6. P-values are calculated using two-sided MWU tests. C) The status of sex for MV+ and MV- patients in EP6. P-value is calculated using a Fisher’s exact test. D) The scatter plot shows the correlation between expression of IDUA aptamer and number of days that patients received mechanical ventilation (n = 50).

389 **Tables**

390

391 **Table 1:** Reactome pathways associated with EP6, based on expression of aptamers. KnowEnG  
392 analytical platform was used. The p-values were calculated using a one-sided Fisher's exact test  
393 and were corrected for multiple tests using Benjamini–Hochberg method. Only signaling  
394 pathways with FDR < 5E-4 are shown in this table (see Table S1 for the full list).

395

| Pathway                                           | FDR      |
|---------------------------------------------------|----------|
| Signaling by Interleukins                         | 2.75E-12 |
| Cytokine Signaling in Immune system               | 6.25E-10 |
| Immune System                                     | 2.28E-06 |
| Signaling by FGFR                                 | 4.75E-06 |
| Constitutive Signaling by Aberrant PI3K in Cancer | 2.94E-05 |
| FGFR2 ligand binding and activation               | 5.77E-05 |
| Extracellular matrix organization                 | 1.85E-04 |
| FGFR3 ligand binding and activation               | 1.85E-04 |
| FGFR3c ligand binding and activation              | 1.85E-04 |
| FGFRL1 modulation of FGFR1 signaling              | 1.85E-04 |
| TNFs bind their physiological receptors           | 2.58E-04 |
| PI3K/AKT Signaling in Cancer                      | 3.28E-04 |
| PI5P, PP2A and IER3 Regulate PI3K/AKT Signaling   | 4.14E-04 |
| Interleukin-4 and 13 signaling                    | 4.91E-04 |

396



397 **Table 2:** Aptamers associated with mechanical ventilation in EP6.

398 In this table, p-values are obtained using a two-sided Mann–Whitney U test and is corrected for  
399 multiple tests using Benjamini–Hochberg FDR. A value of +1 (-1) in the “sign” column shows that  
400 the value of aptamer was higher (lower) in the samples of 55 patients that received mechanical  
401 ventilation in EP6, compared to the rest of EP6 members. Only 14 targets with FDR < 1.2E-02 are  
402 shown. The full list is provided in Table S4.

403

| Target              | Target Full Name                                       | p-values | FDR      | Direction |
|---------------------|--------------------------------------------------------|----------|----------|-----------|
| GGE2D               | G antigen 2D                                           | 2.93E-08 | 1.46E-04 | +1        |
| ANGPTL3             | Angiopoietin-related protein 3                         | 2.76E-06 | 4.58E-03 | +1        |
| Luteinizing hormone | Luteinizing hormone                                    | 2.55E-06 | 4.58E-03 | -1        |
| CRBS                | Beta-crystallin S                                      | 1.01E-05 | 8.37E-03 | -1        |
| NCAM-120            | Neural cell adhesion molecule 1; 120 kDa isoform       | 8.78E-06 | 8.37E-03 | -1        |
| SIA10               | Type 2 lactosamine alpha-2;3-sialyltransferase         | 7.36E-06 | 8.37E-03 | -1        |
| LRP1                | Pro-low-density lipoprotein receptor-related protein 1 | 2.77E-05 | 1.16E-02 | -1        |
| CLM2                | CMRF35-like molecule 2                                 | 2.70E-05 | 1.16E-02 | -1        |
| THS7A               | Thrombospondin type-1 domain-containing protein 7A     | 1.65E-05 | 1.16E-02 | -1        |
| LAP                 | Cytosol aminopeptidase                                 | 3.04E-05 | 1.16E-02 | -1        |
| CXCL16              | C-X-C motif chemokine 16                               | 2.64E-05 | 1.16E-02 | +1        |
| FSH                 | Follicle stimulating hormone                           | 2.52E-05 | 1.16E-02 | -1        |
| VEGF sR2            | Vascular endothelial growth factor receptor 2          | 3.27E-05 | 1.16E-02 | -1        |
| ASGR1               | Asialoglycoprotein receptor 1                          | 2.97E-05 | 1.16E-02 | +1        |

404

405 **Table 3:** SNVs differentiating EP6 against all other endophenotype clusters.

| SNV ID     | Position        | Gene Symbol     | SNV <sup>1</sup> | MAF   | HWE    | OR <sup>2</sup> | p-value  |
|------------|-----------------|-----------------|------------------|-------|--------|-----------------|----------|
| rs1394671  | chr5:7348567    | -               | G > A            | 0.240 | 0.095  | 2.28            | 2.41E-06 |
| rs12186698 | chr5:168880668  | <i>SLIT3</i>    | T > C            | 0.087 | 0.247  | 2.93            | 3.72E-06 |
| rs11625406 | chr14:50049474  | -               | C > A            | 0.438 | 0.137  | 0.47            | 1.03E-05 |
| rs11862889 | chr16:83828886  | -               | T > C            | 0.104 | 0.446  | 2.62            | 1.07E-05 |
| rs2995918  | chr4:37905775   | <i>TBC1D1</i>   | C > T            | 0.494 | 0.776  | 0.49            | 1.20E-05 |
| rs16897810 | chr5:68415296   | -               | G > A            | 0.093 | 0.001  | 2.67            | 1.43E-05 |
| rs2376263  | chr17:35436659  | <i>SLFN13</i>   | G > A            | 0.261 | 0.073  | 2.01            | 2.48E-05 |
| rs4790712  | chr17:1614620   | <i>SLC43A2</i>  | G > A            | 0.441 | 0.003  | 1.97            | 2.50E-05 |
| rs2294566  | chr20:41472939  | <i>CHD6</i>     | C > A            | 0.239 | 0.265  | 2.04            | 2.78E-05 |
| rs7164451  | chr15:48921859  | <i>SHC4</i>     | G > A            | 0.386 | 0.053  | 1.89            | 3.01E-05 |
| rs57664621 | chr8:22808443   | <i>PEBP4</i>    | G > C            | 0.174 | 0.016  | 2.16            | 3.07E-05 |
| rs28482919 | chr3:14903094   | <i>FGD5</i>     | T > C            | 0.187 | 0.053  | 0.32            | 3.20E-05 |
| rs6559283  | chr9:89712560   | -               | T > C            | 0.375 | <0.001 | 1.96            | 3.27E-05 |
| rs657075   | chr5:132094425  | -               | A > G            | 0.104 | 0.328  | 2.49            | 4.28E-05 |
| rs56235109 | chr15:62424001  | <i>TLN2</i>     | A > G            | 0.235 | 0.366  | 0.38            | 4.67E-05 |
| rs7620057  | chr3:179473377  | <i>GNB4</i>     | T > C            | 0.099 | 1.000  | 2.51            | 4.67E-05 |
| rs10466868 | chr12:131455375 | -               | T > G            | 0.108 | 0.401  | 2.51            | 5.94E-05 |
| rs2236798  | chr1:18735127   | <i>PAX7</i>     | A > G            | 0.054 | 0.114  | 2.90            | 6.11E-05 |
| rs3774814  | chr4:5464702    | <i>STK32B</i>   | C > G            | 0.205 | <0.001 | 0.36            | 6.75E-05 |
| rs4497815  | chr19:22903215  | -               | G > A            | 0.216 | 0.205  | 2.07            | 7.52E-05 |
| rs6765694  | chr3:54601810   | <i>CACNA2D3</i> | G > A            | 0.404 | 0.833  | 0.51            | 7.66E-05 |
| rs2797773  | chr6:37559045   | -               | C > T            | 0.422 | 0.000  | 0.53            | 8.06E-05 |
| rs17014760 | chr4:129419725  | -               | A > A            | 0.316 | 0.000  | 1.89            | 9.33E-05 |
| rs10948260 | chr6:45835559   | -               | G > A            | 0.366 | 0.189  | 1.81            | 9.52E-05 |
| rs12035677 | chr1:232391209  | -               | A > G            | 0.063 | 0.000  | 3.02            | 9.95E-05 |

406 Abbreviations used: SNV = Single nucleotide variation, HWE = Hardy Weinberg Equilibrium, MAF  
 407 = Minor allele frequency, OR = Odd ratio.

408

409 <sup>1</sup> SNV are described following GWAS annotations: refence allele > alternative allele (e.g., G > A).

410 <sup>2</sup> Logistic regression analyses using additive model adjusted for the 2 principal components.

411

412 **Table 4:** Association between genotypes and aptamer expression levels

| SNV        | Gene Symbol     | Nearest gene | Aptamers normalized expression <sup>1</sup> |                 |                   |                    | Multiple logistic regression analyses <sup>3</sup> |        |                     |        |
|------------|-----------------|--------------|---------------------------------------------|-----------------|-------------------|--------------------|----------------------------------------------------|--------|---------------------|--------|
|            |                 |              | HM <sub>ref</sub>                           | HTZ             | HM <sub>alt</sub> | p-val <sup>2</sup> | Aptamers OR                                        | p-val  | SNV OR              | p-val  |
| rs6765694  | <i>CACNA2D3</i> | -            | -0.09<br>(±0.89)                            | 0.01<br>(±1.10) | 0.24 *<br>(±0.99) | <b>0.011</b>       | 0.61<br>(0.46-0.79)                                | 2.5E-4 | 0.52<br>(0.37-0.74) | 2.4E-4 |
| rs10948260 | -               | <i>CLIC5</i> | 0.02<br>(±0.92)                             | 0.02<br>(±1.09) | -0.02<br>(±0.97)  | 0.796              | 0.68<br>(0.55-0.83)                                | 1.7E-4 | 1.83<br>(1.35-2.48) | 8.8E-5 |
| rs657075   | -               | <i>IL3</i>   | -0.01<br>(±1.01)                            | 0.05<br>(±0.99) | 0.32<br>(±0.46)   | 0.328              | 1.37<br>(1.14-11.64)                               | 8.2E-4 | 2.49<br>(1.60-3.88) | 5.2E-5 |
| rs7164451  | <i>SHC4</i>     | -            | -0.07<br>(±0.90)                            | 0.01<br>(±1.05) | 0.23 *<br>(±1.16) | <b>0.017</b>       | 11.98<br>(7.61-18.87)                              | 8.4E-  | 2.00<br>(1.30-3.09) | 1.8E-3 |
| rs12186698 | <i>SLIT3</i>    | -            | 0.00<br>(±1.02)                             | 0.07<br>(±1.06) | 0.15<br>(±0.89)   | 0.509              | 0.82<br>(0.64-1.06)                                | 0.135  | 2.99<br>(1.89-4.73) | 2.7E-6 |
| rs56235109 | <i>TLN2</i>     | -            | -0.03<br>(±0.98)                            | 0.06<br>(±1.03) | 0.04<br>(±1.27)   | 0.353              | 0.58<br>(0.45-0.75)                                | 2.7E-5 | 0.38<br>(0.23-0.60) | 4.7E-5 |

413 Abbreviations used: SNV = Single nucleotide variation, HM<sub>ref</sub> = Homozygotes for the reference  
 414 allele, HM<sub>alt</sub> = Homozygotes for the alternative allele, HTZ = Heterozygotes, OR = Odd ratio.

415  
 416 <sup>1</sup> Aptamers' normalized levels of expression are reported as mean (± standard deviation).  
 417 Normalization steps for aptamer expressions are described in Methods.

418 <sup>2</sup> p-value, standard ANOVA analyses followed by Tukey *post hoc* analyses. Asterisks (\*) identify  
 419 difference between HM<sub>ref</sub> and HM<sub>alt</sub> genotypes.

420 <sup>3</sup> Multiple logistic regression analyses models include aptamers expression values, SNV  
 421 genotypes (additive model) and the two principal components. OR are reported with 95%  
 422 confidence intervals in parentheses.

423

424

## 425 References

- 426 1. Sanders JM, Monogue ML, Jodlowski TZ, Cutrell JB. Pharmacologic Treatments for  
427 Coronavirus Disease 2019 (COVID-19): A Review. *JAMA* 2020; 323: 1824-1836.
- 428 2. Lim ZJ, Subramaniam A, Ponnappa Reddy M, Blecher G, Kadam U, Afroz A, et al. Case  
429 Fatality Rates for Patients with COVID-19 Requiring Invasive Mechanical Ventilation. A  
430 Meta-analysis. *Am J Respir Crit Care Med* 2021; 203: 54-66.
- 431 3. Berrettini WH. Genetic bases for endophenotypes in psychiatric disorders. *Dialogues Clin  
432 Neurosci* 2005; 7: 95-101.
- 433 4. Froidure A, Mouthuy J, Durham SR, Chanez P, Sibille Y, Pilette C. Asthma phenotypes and  
434 IgE responses. *Eur Respir J* 2016; 47: 304-19.
- 435 5. Barnes PJ. Inflammatory endotypes in COPD. *Allergy* 2019; 74: 1249-1256.
- 436 6. Koennecke M, Klimek L, Mullol J, Gevaert P, Wollenberg B. Subtyping of polyposis nasi:  
437 phenotypes, endotypes and comorbidities. *Allergo J Int* 2018; 27: 56-65.
- 438 7. Baghela A, An A, Zhang P, Acton E, Gauthier J, Brunet-Ratnasingham E, et al. Predicting  
439 severity in COVID-19 disease using sepsis blood gene expression signatures. *Sci Rep* 2023;  
440 13: 1247.
- 441 8. LaSalle TJ, Gonye ALK, Freeman SS, Kaplonek P, Gushterova I, Kays KR, et al. Longitudinal  
442 characterization of circulating neutrophils uncovers phenotypes associated with severity  
443 in hospitalized COVID-19 patients. *Cell Rep Med* 2022; 3: 100779.
- 444 9. Ma W, Soulé A, Tremblay K, Rousseau S, Emad A. A circulating proteome-informed  
445 prognostic model of COVID-19 disease activity that relies on routinely available clinical  
446 laboratories. *medRxiv* 2022: 2022.11.02.22281834.
- 447 10. Welin A, Amirbeagi F, Christenson K, Björkman L, Björnsdottir H, Forsman H, et al. The  
448 Human Neutrophil Subsets Defined by the Presence or Absence of OLFM4 Both  
449 Transmigrate into Tissue In Vivo and Give Rise to Distinct NETs In Vitro. *PLOS ONE* 2013;  
450 8: e69575.
- 451 11. Blatti III C, Emad A, Berry MJ, Gatzke L, Epstein M, Lanier D, et al. Knowledge-guided  
452 analysis of "omics" data using the KnowEnG cloud platform. *PLoS biology* 2020; 18:  
453 e3000583.
- 454 12. Gillespie M, Jassal B, Stephan R, Milacic M, Rothfels K, Senff-Ribeiro A, et al. The reactome  
455 pathway knowledgebase 2022. *Nucleic Acids Research* 2021; 50: D687-D692.

- 456 13. Blachier F, Andriamihaja M, Blais A. Sulfur-Containing Amino Acids and Lipid Metabolism.  
457 *The Journal of Nutrition* 2020; 150: 2524S-2531S.
- 458 14. Ye C, Sutter BM, Wang Y, Kuang Z, Tu BP. A metabolic function for phospholipid and  
459 histone methylation. *Molecular cell* 2017; 66: 180-193. e8.
- 460 15. Tavoosi N, Davis-Harrison RL, Pogorelov TV, Ohkubo YZ, Arcario MJ, Clay MC, et al.  
461 Molecular Determinants of Phospholipid Synergy in Blood Clotting. *Journal of Biological*  
462 *Chemistry* 2011; 286: 23247-23253.
- 463 16. Parman T, Bunin DI, Ng HH, McDunn JE, Wulff JE, Wang A, et al. Toxicogenomics and  
464 metabolomics of pentamethylchromanol (PMCol)-induced hepatotoxicity. *Toxicological*  
465 *Sciences* 2011; 124: 487-501.
- 466 17. Grohmann U, Volpi C, Fallarino F, Bozza S, Bianchi R, Vacca C, et al. Reverse signaling  
467 through G1TR ligand enables dexamethasone to activate IDO in allergy. *Nature Medicine*  
468 2007; 13: 579-586.
- 469 18. Marfia G, Navone S, Guarnaccia L, Campanella R, Mondoni M, Locatelli M, et al. Decreased  
470 serum level of sphingosine-1-phosphate: a novel predictor of clinical severity in COVID-  
471 19. *EMBO molecular medicine* 2021; 13: e13424.
- 472 19. Lone MA, Hülsmeier AJ, Saied EM, Karsai G, Arenz C, von Eckardstein A, et al. Subunit  
473 composition of the mammalian serine-palmitoyltransferase defines the spectrum of  
474 straight and methyl-branched long-chain bases. *Proceedings of the National Academy of*  
475 *Sciences* 2020; 117: 15591-15598.
- 476 20. Han G, Gupta SD, Gable K, Niranjanakumari S, Moitra P, Eichler F, et al. Identification of  
477 small subunits of mammalian serine palmitoyltransferase that confer distinct acyl-CoA  
478 substrate specificities. *Proceedings of the National Academy of Sciences* 2009; 106: 8186-  
479 8191.
- 480 21. Chen PY, Gao WY, Liou JW, Lin CY, Wu MJ, Yen JH. Angiopoietin-Like Protein 3 (ANGPTL3)  
481 Modulates Lipoprotein Metabolism and Dyslipidemia. *Int J Mol Sci* 2021; 22.
- 482 22. Lachkar F, Ferré P, Fougelle F, Papaioannou A. Dihydroceramides: their emerging  
483 physiological roles and functions in cancer and metabolic diseases. *American Journal of*  
484 *Physiology-Endocrinology and Metabolism* 2021; 320: E122-E130.
- 485 23. Koishi R, Ando Y, Ono M, Shimamura M, Yasumo H, Fujiwara T, et al. Angptl3 regulates  
486 lipid metabolism in mice. *Nature Genetics* 2002; 30: 151-157.
- 487 24. Pisciotta L, Favari E, Magnolo L, Simonelli S, Adorni MP, Sallo R, et al. Characterization of  
488 Three Kindreds With Familial Combined Hypolipidemia Caused by Loss-of-Function  
489 Mutations of ANGPTL3. *Circulation: Cardiovascular Genetics* 2012; 5: 42-50.

- 490 25. Lekka ME, Liokatis S, Nathanail C, Galani V, Nakos G. The Impact of Intravenous Fat  
491 Emulsion Administration in Acute Lung Injury. *American Journal of Respiratory and Critical*  
492 *Care Medicine* 2004; 169: 638-644.
- 493 26. Ahmad Z, Banerjee P, Hamon S, Chan K-C, Bouzelmat A, Sasiela WJ, et al. Inhibition of  
494 Angiotensin-Like Protein 3 With a Monoclonal Antibody Reduces Triglycerides in  
495 Hypertriglyceridemia. *Circulation* 2019; 140: 470-486.
- 496 27. Bie H, Yin J, He X, Kermode AR, Goddard-Borger ED, Withers SG, et al. Insights into  
497 mucopolysaccharidosis I from the structure and action of  $\alpha$ -L-iduronidase. *Nature*  
498 *Chemical Biology* 2013; 9: 739-745.
- 499 28. Helms J, Tacquard C, Severac F, Leonard-Lorant I, Ohana M, Delabranche X, et al. High risk  
500 of thrombosis in patients with severe SARS-CoV-2 infection: a multicenter prospective  
501 cohort study. *Intensive Care Medicine* 2020; 46: 1089-1098.
- 502 29. Asakura H, Ogawa H. COVID-19-associated coagulopathy and disseminated intravascular  
503 coagulation. *International Journal of Hematology* 2021; 113: 45-57.
- 504 30. Fahmy OH, Daas FM, Salunkhe V, Petrey JL, Cosar EF, Ramirez J, et al. Is Microthrombosis  
505 the Main Pathology in Coronavirus Disease 2019 Severity?-A Systematic Review of the  
506 Postmortem Pathologic Findings. *Crit Care Explor* 2021; 3: e0427.
- 507 31. Barnes BJ, Adrover JM, Baxter-Stoltzfus A, Borczuk A, Cools-Lartigue J, Crawford JM, et al.  
508 Targeting potential drivers of COVID-19: Neutrophil extracellular traps. *Journal of*  
509 *Experimental Medicine* 2020; 217.
- 510 32. Bonaventura A, Vecchié A, Dagna L, Martinod K, Dixon DL, Van Tassell BW, et al.  
511 Endothelial dysfunction and immunothrombosis as key pathogenic mechanisms in COVID-  
512 19. *Nature Reviews Immunology* 2021; 21: 319-329.
- 513 33. Ding J, Hostallero DE, El Khili MR, Fonseca GJ, Milette S, Noorah N, et al. A network-  
514 informed analysis of SARS-CoV-2 and hemophagocytic lymphohistiocytosis genes'  
515 interactions points to Neutrophil extracellular traps as mediators of thrombosis in COVID-  
516 19. *PLoS Computational Biology* 2021; 17: e1008810.
- 517 34. Blasco A, Coronado M-J, Hernández-Terciado F, Martín P, Royuela A, Ramil E, et al.  
518 Assessment of neutrophil extracellular traps in coronary thrombus of a case series of  
519 patients with COVID-19 and myocardial infarction. *JAMA cardiology* 2021; 6: 469-474.
- 520 35. Desilles JP, Solo Nomenjanahary M, Consoli A, Ollivier V, Faille D, Bourrienne MC, et al.  
521 Impact of COVID-19 on thrombus composition and response to thrombolysis: Insights  
522 from a monocentric cohort population of COVID-19 patients with acute ischemic stroke.  
523 *Journal of Thrombosis and Haemostasis* 2022; 20: 919-928.

- 524 36. Englert H, Rangaswamy C, Deppermann C, Sperhake J-P, Krisp C, Schreier D, et al.  
525 Defective NET clearance contributes to sustained FXII activation in COVID-19-associated  
526 pulmonary thrombo-inflammation. *EBioMedicine* 2021; 67: 103382.
- 527 37. Leppkes M, Knopf J, Naschberger E, Lindemann A, Singh J, Herrmann I, et al. Vascular  
528 occlusion by neutrophil extracellular traps in COVID-19. *EBioMedicine* 2020; 58: 102925.
- 529 38. Middleton EA, He X-Y, Denorme F, Campbell RA, Ng D, Salvatore SP, et al. Neutrophil  
530 extracellular traps contribute to immunothrombosis in COVID-19 acute respiratory  
531 distress syndrome. *Blood* 2020; 136: 1169-1179.
- 532 39. Obermayer A, Jakob L-M, Haslbauer JD, Matter MS, Tzankov A, Stoiber W. Neutrophil  
533 extracellular traps in fatal COVID-19-associated lung injury. *Disease markers* 2021; 2021.
- 534 40. Ouwendijk WJ, Raadsen MP, Van Kampen JJ, Verdijk RM, Von Der Thusen JH, Guo L, et al.  
535 High levels of neutrophil extracellular traps persist in the lower respiratory tract of  
536 critically ill patients with coronavirus disease 2019. *The Journal of infectious diseases*  
537 2021; 223: 1512-1521.
- 538 41. Petito E, Falcinelli E, Paliani U, Cesari E, Vaudo G, Sebastiano M, et al. Association of  
539 neutrophil activation, more than platelet activation, with thrombotic complications in  
540 coronavirus disease 2019. *The Journal of infectious diseases* 2021; 223: 933-944.
- 541 42. Skendros P, Mitsios A, Chrysanthopoulou A, Mastellos DC, Metallidis S, Rafailidis P, et al.  
542 Complement and tissue factor–enriched neutrophil extracellular traps are key drivers in  
543 COVID-19 immunothrombosis. *The Journal of clinical investigation* 2020; 130: 6151-6157.
- 544 43. Massberg S, Grahl L, von Bruehl M-L, Manukyan D, Pfeiler S, Goosmann C, et al. Reciprocal  
545 coupling of coagulation and innate immunity via neutrophil serine proteases. *Nature*  
546 *Medicine* 2010; 16: 887-896.
- 547 44. Papayannopoulos V, Metzler KD, Hakkim A, Zychlinsky A. Neutrophil elastase and  
548 myeloperoxidase regulate the formation of neutrophil extracellular traps. *Journal of Cell*  
549 *Biology* 2010; 191: 677-691.
- 550 45. Alder MN, Opoka AM, Lahni P, Hildeman DA, Wong HR. Olfactomedin-4 Is a Candidate  
551 Marker for a Pathogenic Neutrophil Subset in Septic Shock. *Critical Care Medicine* 2017;  
552 45: e426-e432.
- 553 46. Stafford JH, Thorpe PE. Increased exposure of phosphatidylethanolamine on the surface  
554 of tumor vascular endothelium. *Neoplasia* 2011; 13: 299-IN2.
- 555 47. Ran S, Downes A, Thorpe PE. Increased exposure of anionic phospholipids on the surface  
556 of tumor blood vessels. *Cancer research* 2002; 62: 6132-6140.



- 557 48. Port JR, Adney DR, Schwarz B, Schulz JE, Sturdevant DE, Smith BJ, et al. High-fat high-sugar  
558 diet-induced changes in the lipid metabolism are associated with mildly increased COVID-  
559 19 severity and delayed recovery in the Syrian hamster. *Viruses* 2021; 13: 2506.
- 560 49. MacDonald J, Sprecher H. Distribution of arachidonic acid in choline-and ethanolamine-  
561 containing phosphoglycerides in subfractionated human neutrophils. *Journal of Biological*  
562 *Chemistry* 1989; 264: 17718-17726.
- 563 50. Papageorgiou C, Jourdi G, Adjambri E, Walborn A, Patel P, Fareed J, et al. Disseminated  
564 intravascular coagulation: an update on pathogenesis, diagnosis, and therapeutic  
565 strategies. *Clinical and Applied Thrombosis/Hemostasis* 2018; 24: 8S-28S.
- 566 51. Lacal PM, Petrillo MG, Ruffini F, Muzi A, Bianchini R, Ronchetti S, et al. Glucocorticoid-  
567 induced tumor necrosis factor receptor family-related ligand triggering upregulates  
568 vascular cell adhesion molecule-1 and intercellular adhesion molecule-1 and promotes  
569 leukocyte adhesion. *J Pharmacol Exp Ther* 2013; 347: 164-72.
- 570 52. Pandit R, Singh I, Ansari A, Raval J, Patel Z, Dixit R, et al. First report on genome wide  
571 association study in western Indian population reveals host genetic factors for COVID-19  
572 severity and outcome. *Genomics* 2022; 114: 110399.
- 573 53. Goligher EC, Bradbury CA, McVerry BJ, Lawler PR, Berger JS, Gong MN, et al. Therapeutic  
574 Anticoagulation with Heparin in Critically Ill Patients with Covid-19. *N Engl J Med* 2021;  
575 385: 777-789.
- 576 54. Lawler PR, Goligher EC, Berger JS, Neal MD, McVerry BJ, Nicolau JC, et al. Therapeutic  
577 Anticoagulation with Heparin in Noncritically Ill Patients with Covid-19. *N Engl J Med*  
578 2021; 385: 790-802.
- 579 55. Smadja DM, Philippe A, Bory O, Gendron N, Beauvais A, Gruet M, et al. Placental growth  
580 factor level in plasma predicts COVID-19 severity and in-hospital mortality. *Journal of*  
581 *Thrombosis and Haemostasis* 2021; 19: 1823-1830.
- 582 56. Bussolari C, Palumbo D, Fominsky E, Nardelli P, De Lorenzo R, Vitali G, et al. Case Report:  
583 Nintedaninb May Accelerate Lung Recovery in Critical Coronavirus Disease 2019. *Frontiers*  
584 *in Medicine* 2021; 8: 766486.
- 585 57. Liu W, Peng Y, Tobin DJ. A new 12-gene diagnostic biomarker signature of melanoma  
586 revealed by integrated microarray analysis. *PeerJ* 2013; 1: e49.
- 587 58. Luo S, Feofanova EV, Tin A, Tung S, Rhee EP, Coresh J, et al. Genome-wide association  
588 study of serum metabolites in the African American Study of Kidney Disease and  
589 Hypertension. *Kidney International* 2021; 100: 430-439.



- 590 59. Agarwal B, Gatt A, Riddell A, Wright G, Chowdary P, Jalan R, et al. Hemostasis in patients  
591 with acute kidney injury secondary to acute liver failure. *Kidney International* 2013; 84:  
592 158-163.
- 593 60. Williams R, Schalm SW, O'Grady JG. Acute liver failure: redefining the syndromes. *The*  
594 *Lancet* 1993; 342: 273-275.
- 595 61. Durinck S, Spellman PT, Birney E, Huber W. Mapping identifiers for the integration of  
596 genomic datasets with the R/Bioconductor package biomaRt. *Nature Protocols* 2009; 4:  
597 1184-1191.
- 598 62. R Core Team. R: A Language and Environment for Statistical Computing. Vienna, Austria:  
599 R Foundation for Statistical Computing; 2022. Available from: [https://www.R-](https://www.R-project.org/)  
600 [project.org/](https://www.R-project.org/).
- 601 63. Marees AT, de Kluiver H, Stringer S, Vorspan F, Curis E, Marie-Claire C, et al. A tutorial on  
602 conducting genome-wide association studies: Quality control and statistical analysis. *Int J*  
603 *Methods Psychiatr Res* 2018; 27: e1608.
- 604 64. Ochoa A. *genio: Genetics Input/Output Functions*. R package version 1.1.1; 2022. Available  
605 from: <https://CRAN.R-project.org/package=genio>.
- 606 65. Warnes G, Gorjanc G, Leisch F, Man M. *genetics: Population Genetics*. R package version  
607 1.3.8.1.3; 2021. Available from: <https://CRAN.R-project.org/package=genetics>.
- 608 66. Zheng X, Levine D, Shen J, Gogarten SM, Laurie C, Weir BS. A high-performance computing  
609 toolset for relatedness and principal component analysis of SNP data. *Bioinformatics*  
610 2012; 28: 3326-3328.
- 611 67. Perdry H, Dandine-Roulland C. *gaston: Genetic Data Handling (QC, GRM, LD, PCA) &*  
612 *Linear Mixed Models*. R package version 1.5.7; 2020. Available from: [https://CRAN.R-](https://CRAN.R-project.org/package=gaston)  
613 [project.org/package=gaston](https://CRAN.R-project.org/package=gaston).
- 614
